# Supplementary material for: Probing the Subcellular Localization of Hopanoid Lipids in Bacteria Using NanoSIMS
Source: PLOS journal article supplement (doi:10.1371/journal.pone.0084455), 2014-01-07
Supplement: S2 (10.1371/journal.pone.0084455.s002) [file journal.pone.0084455.s002.pdf]

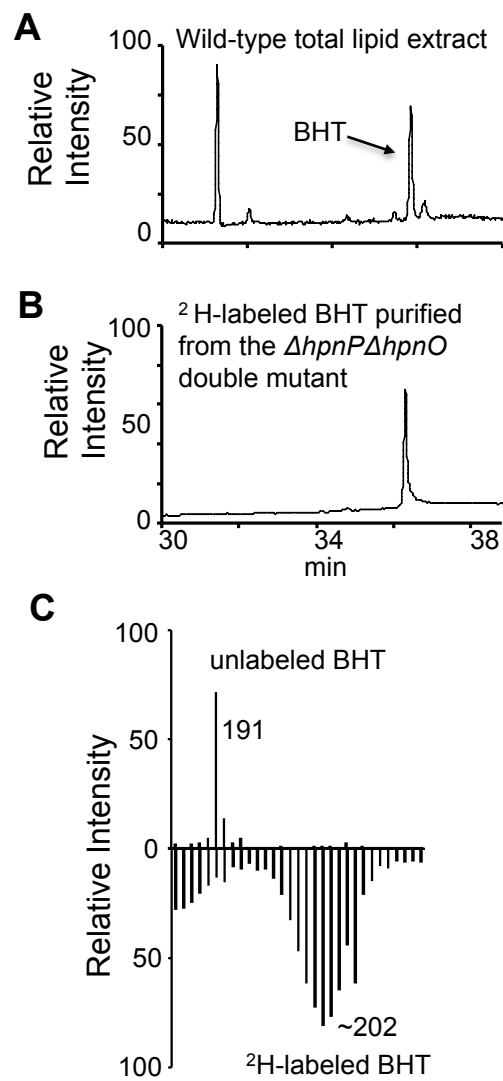

**Figure S2.**
